# Supplementary material for: Novel Canthin-6-one Derivatives: Design, Synthesis, and Their Antiproliferative Activities via Inducing Apoptosis, Deoxyribonucleic Acid Damage, and Ferroptosis
Source: PubMed Central journal article supplement — ACS Omega. 2023 Aug 18;8(34):31215–24. doi: 10.1021/acsomega.3c03358 (PMC10468838; doi:10.1021/acsomega.3c03358), 2023-08-18
Supplement: ao3c03358_si_001.pdf [file ao3c03358_si_001.pdf]

## Supporting Information

### Novel Canthin-6-one Derivatives: Design, Synthesis, and their Antiproliferative Activities via Inducing Apoptosis, DNA Damage, and Ferroptosis

*Jinfeng Ding<sup>a,b,#,\*</sup>, Tiantian Sun<sup>b,c,#</sup>, Hongmei Wu<sup>b,c</sup>, Hongwei Zheng<sup>b</sup>, Sijia Wang<sup>b,c</sup>,  
Dezhi Wang<sup>b,c</sup>, Wenpei Shan<sup>b</sup>, Yong Ling<sup>b,c,\*</sup>, Yanan Zhang<sup>b,c,\*</sup>*

<sup>a</sup>Department of Pharmacy, Jiangsu Vocational College of Medicine, Yancheng, 224005, China.

<sup>b</sup>School of Pharmacy and Jiangsu Province Key Laboratory for Inflammation and Molecular Drug Target, Nantong University, Nantong, 226001, China.

<sup>c</sup>Nantong Key Laboratory of Small Molecular Drug Innovation, School of Pharmacy, Nantong University, Nantong 226001, China.

#### Contents:

|                                                                    |         |
|--------------------------------------------------------------------|---------|
| 1. The <sup>1</sup> H NMR spectra for compounds <b>8a-l</b> .....  | S2-S7   |
| 2. The <sup>13</sup> C NMR spectra for compounds <b>8a-l</b> ..... | S8-13   |
| 3. The HRMS spectra for compounds <b>8a-l</b> .....                | S14-S19 |
| 4. The HPLC spectra for compounds <b>8h</b> .....                  | S20     |

## 1. The $^1\text{H}$ NMR spectra for 8a-l

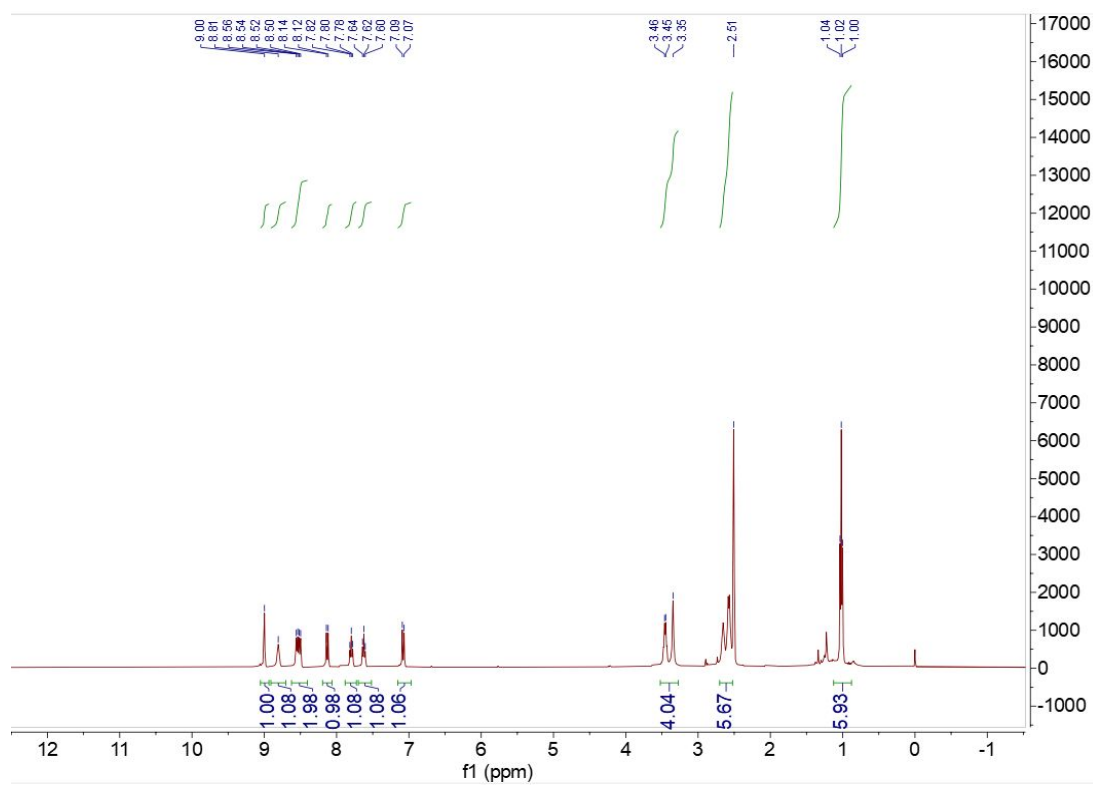

Figure S1.  $^1\text{H}$  NMR spectrum (400 MHz,  $\text{DMSO}-d_6$ ) of 8a.

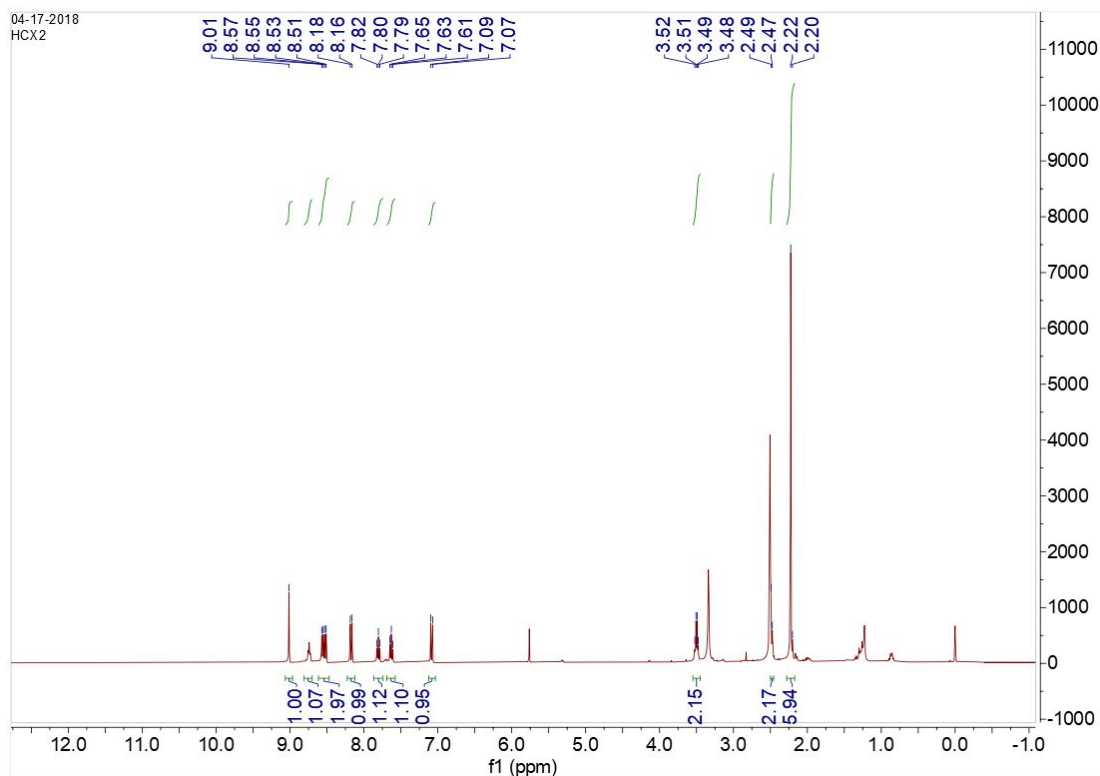

**Figure S2.**  $^1\text{H}$  NMR spectrum (400 MHz,  $\text{DMSO-}d_6$ ) of **8b**.

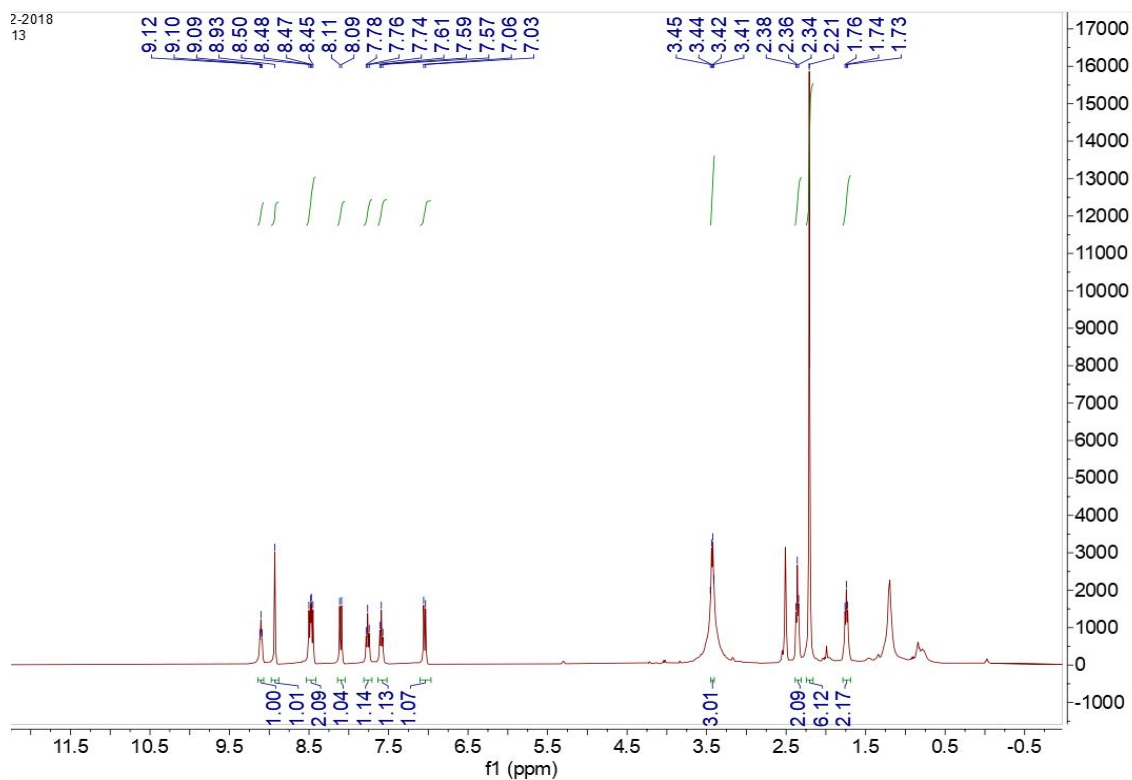

**Figure S3.**  $^1\text{H}$  NMR spectrum (400 MHz,  $\text{DMSO-}d_6$ ) of **8c**.

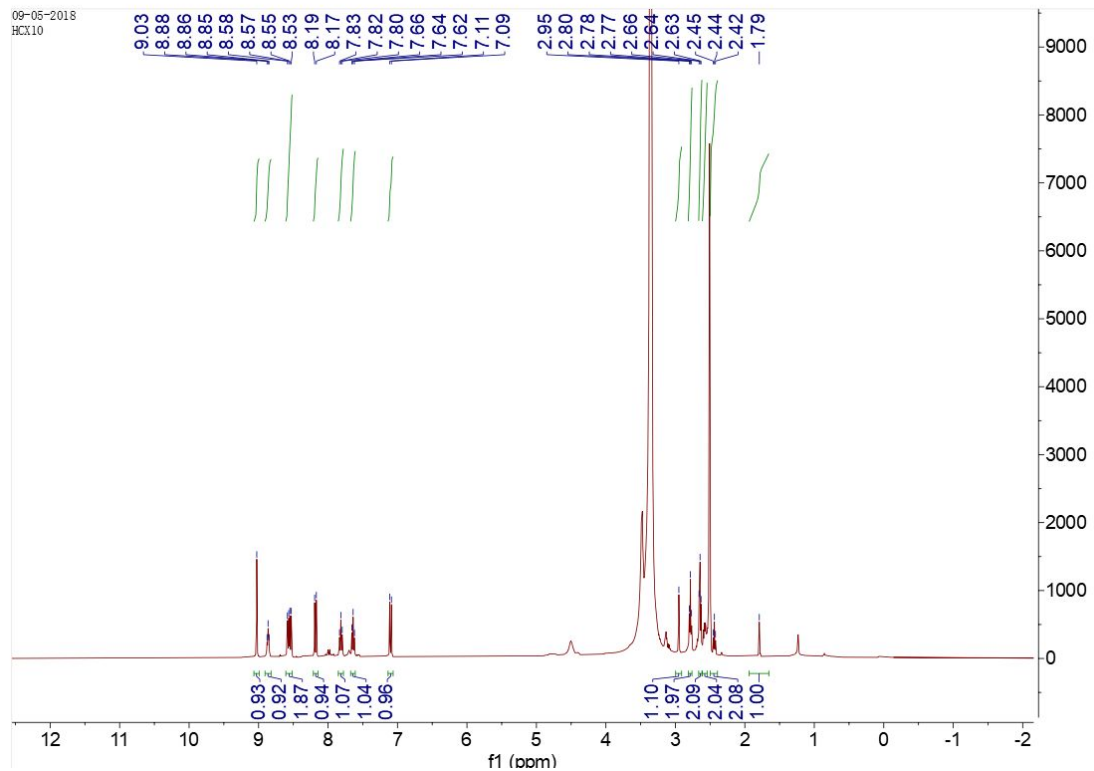

Figure S4.  $^1\text{H}$  NMR spectrum (400 MHz,  $\text{DMSO-}d_6$ ) of **8d**.

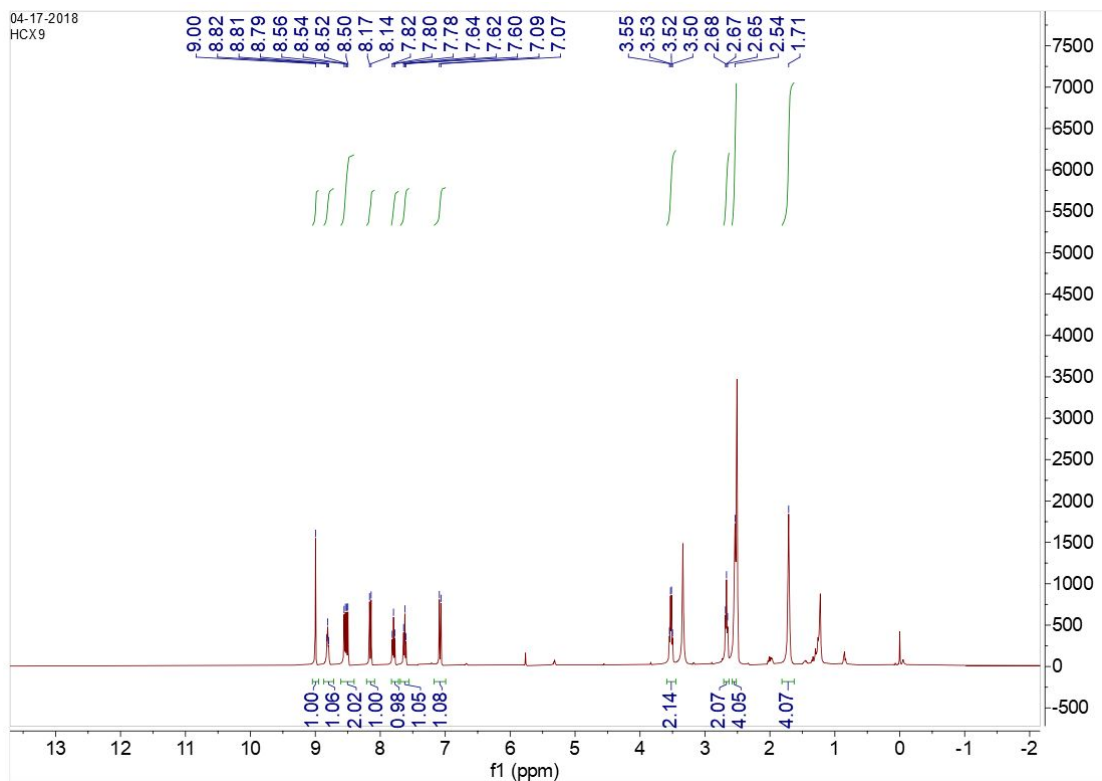

Figure S5.  $^1\text{H}$  NMR spectrum (400 MHz,  $\text{DMSO-}d_6$ ) of **8e**.

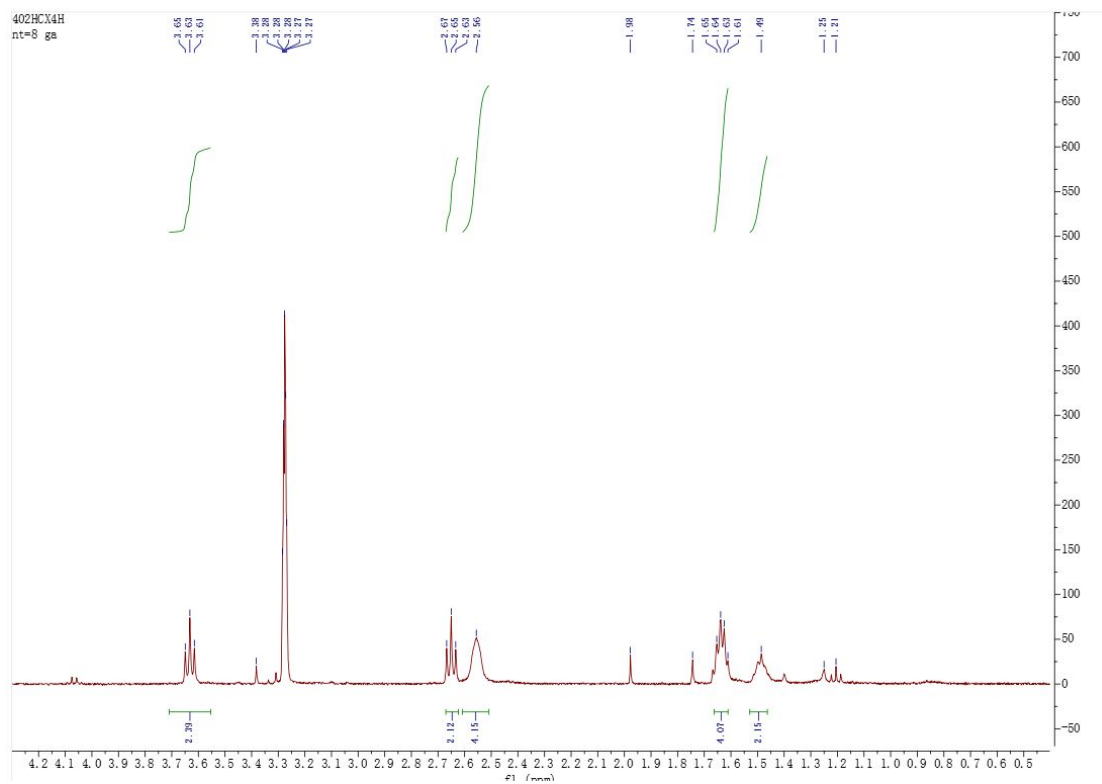

Figure S6.  $^1\text{H}$  NMR spectrum (400 MHz,  $\text{DMSO}-d_6$ ) of **8f**.

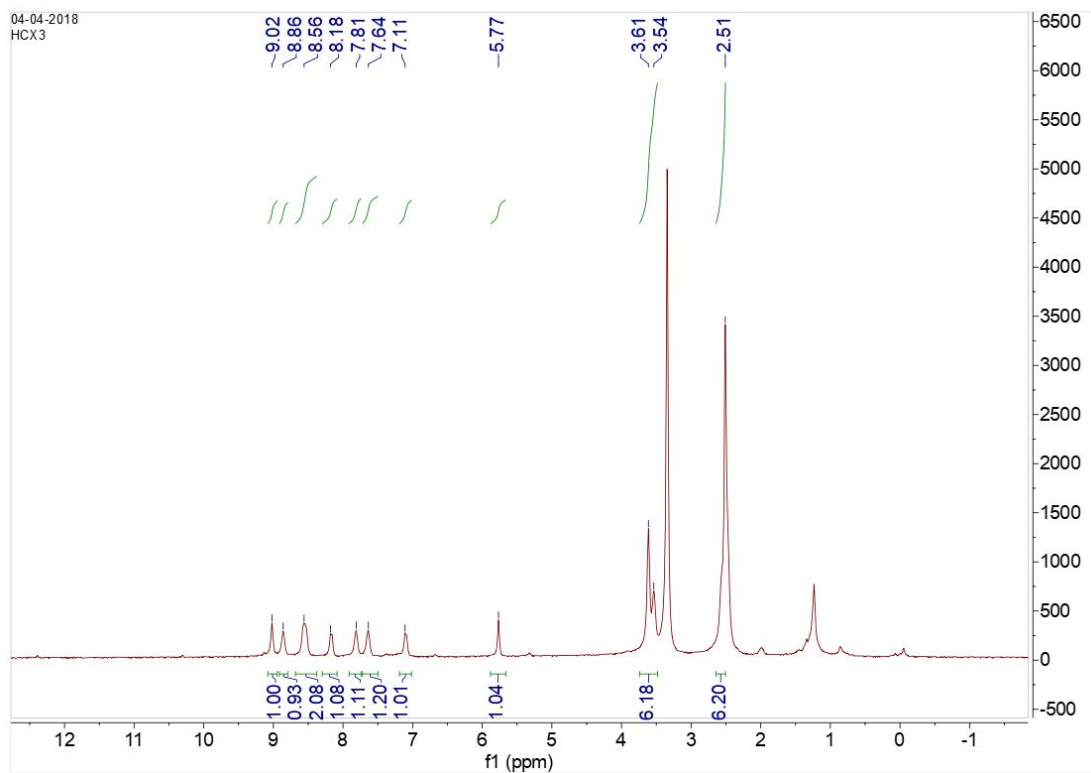

Figure S7.  $^1\text{H}$  NMR spectrum (400 MHz,  $\text{DMSO}-d_6$ ) of **8g**.

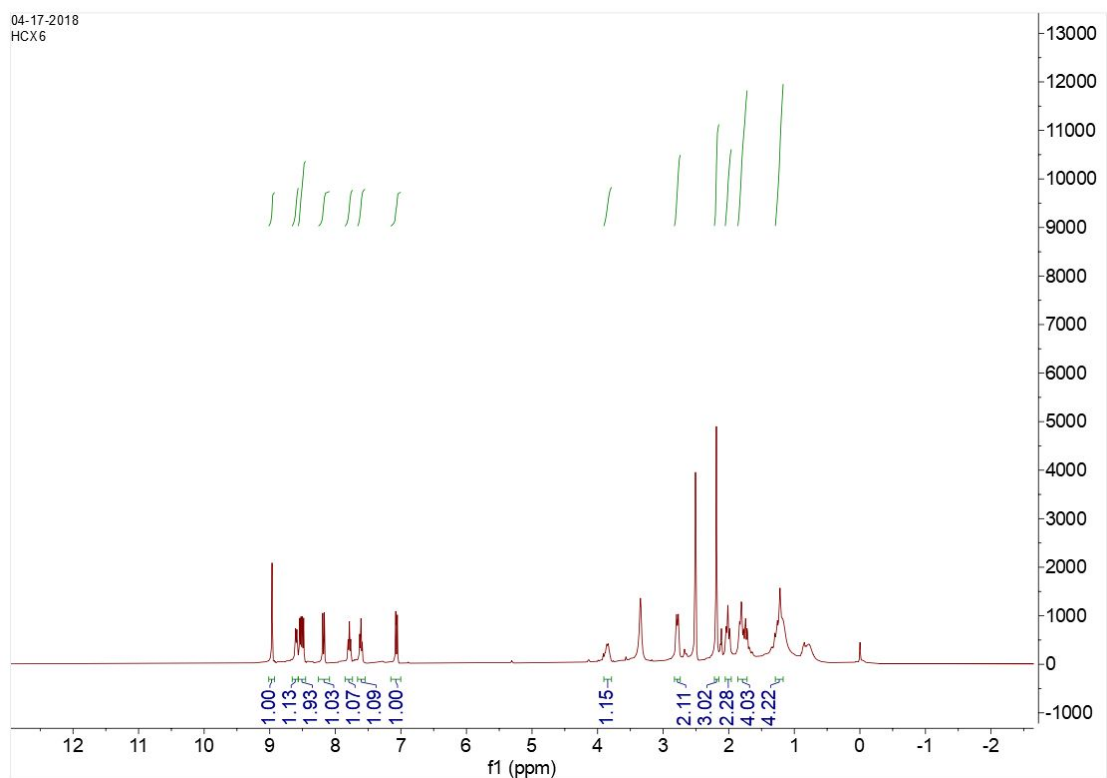

**Figure S8.**  $^1\text{H}$  NMR spectrum (400 MHz,  $\text{DMSO-}d_6$ ) of **8h**.

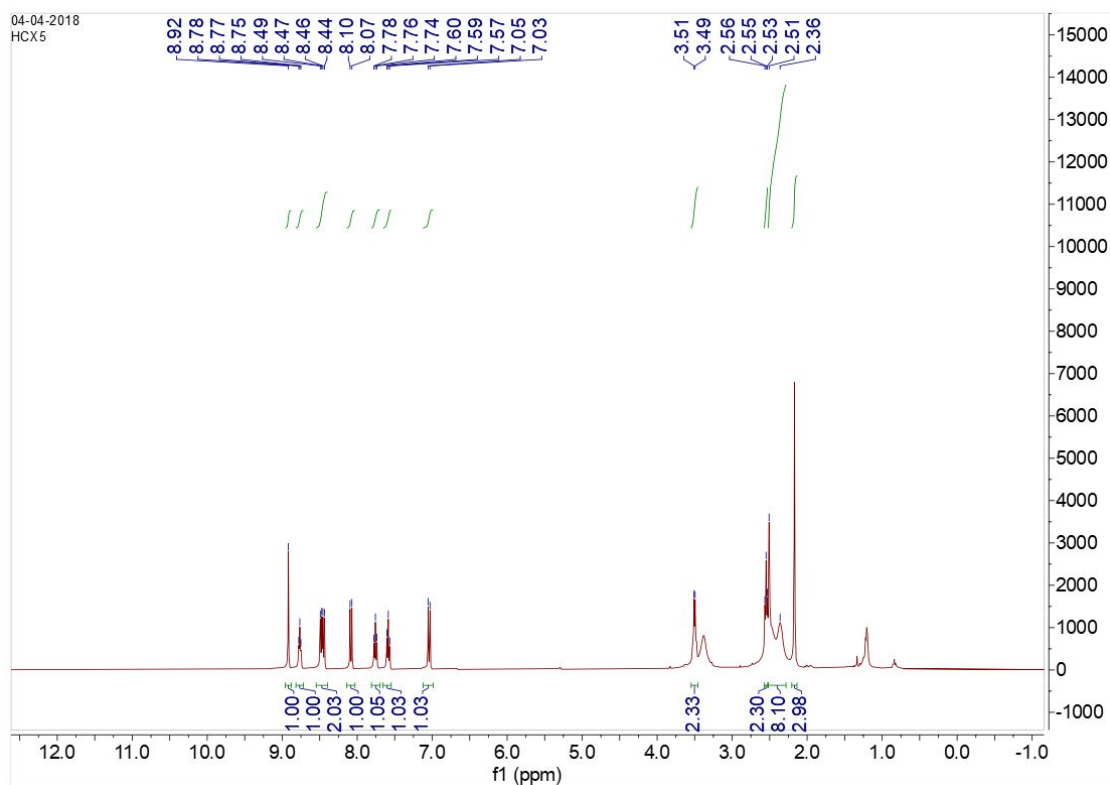

**Figure S9.**  $^1\text{H}$  NMR spectrum (400 MHz,  $\text{DMSO-}d_6$ ) of **8i**.

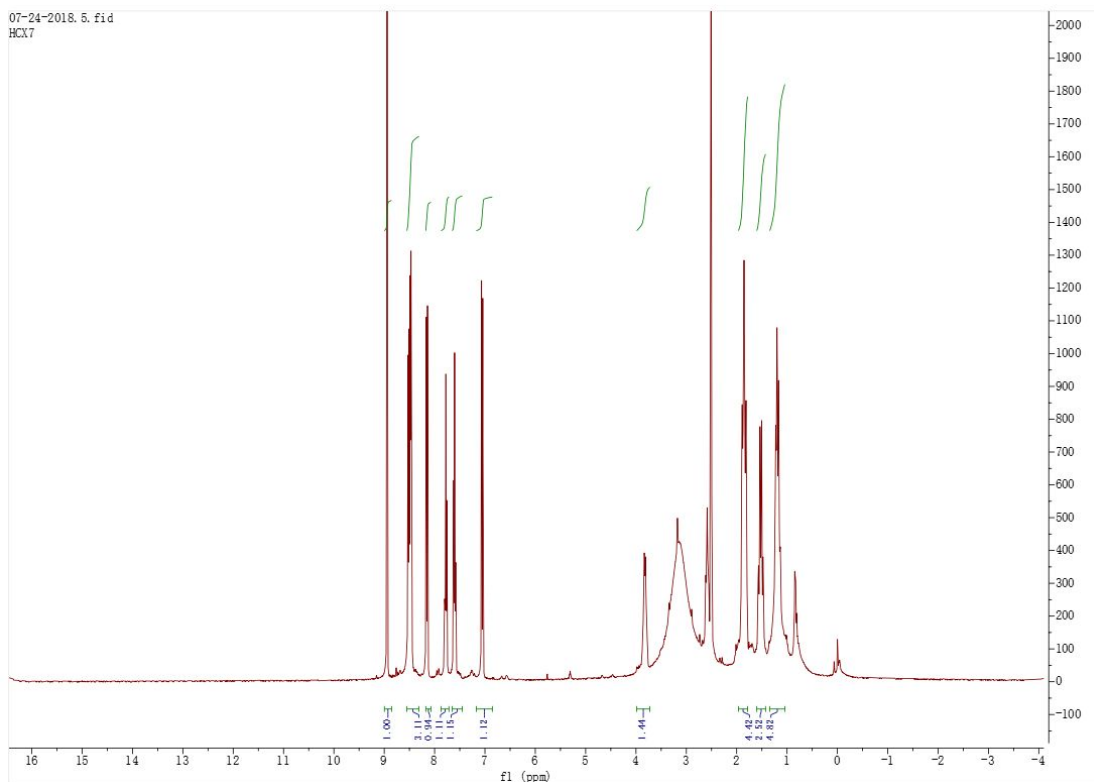

**Figure S10.**  $^1\text{H}$  NMR spectrum (400 MHz,  $\text{DMSO-}d_6$ ) of **8j**.

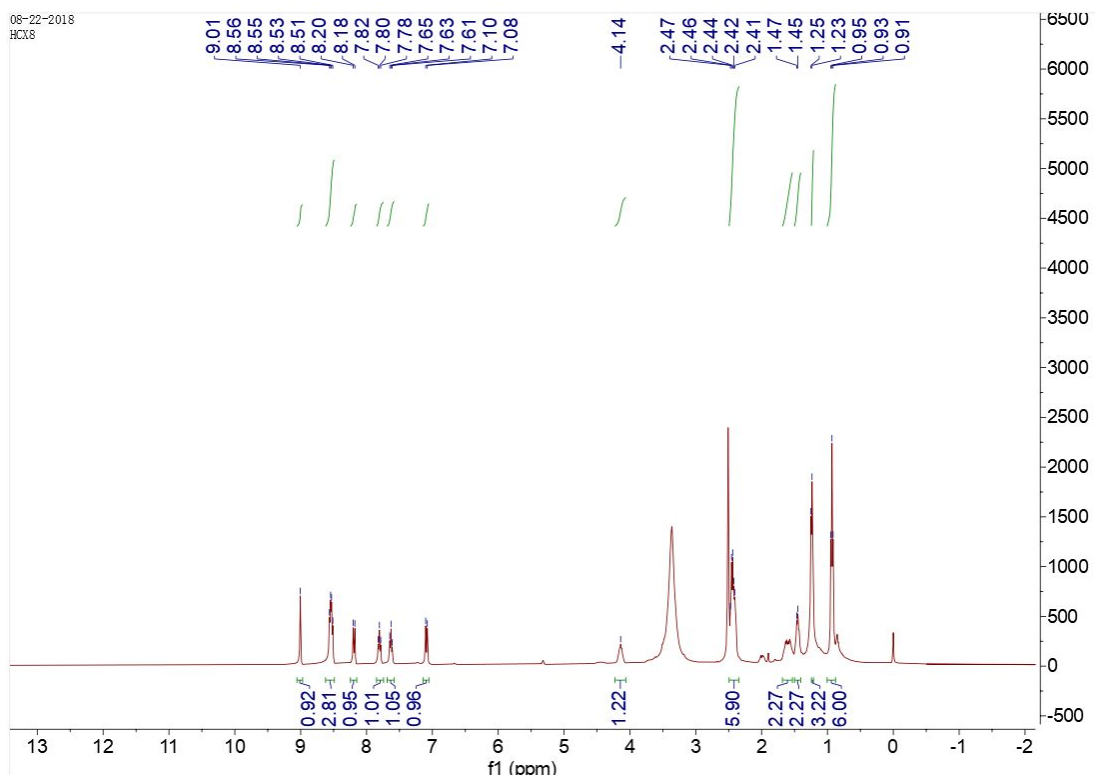

**Figure S11.**  $^1\text{H}$  NMR spectrum (400 MHz,  $\text{DMSO-}d_6$ ) of **8k**.

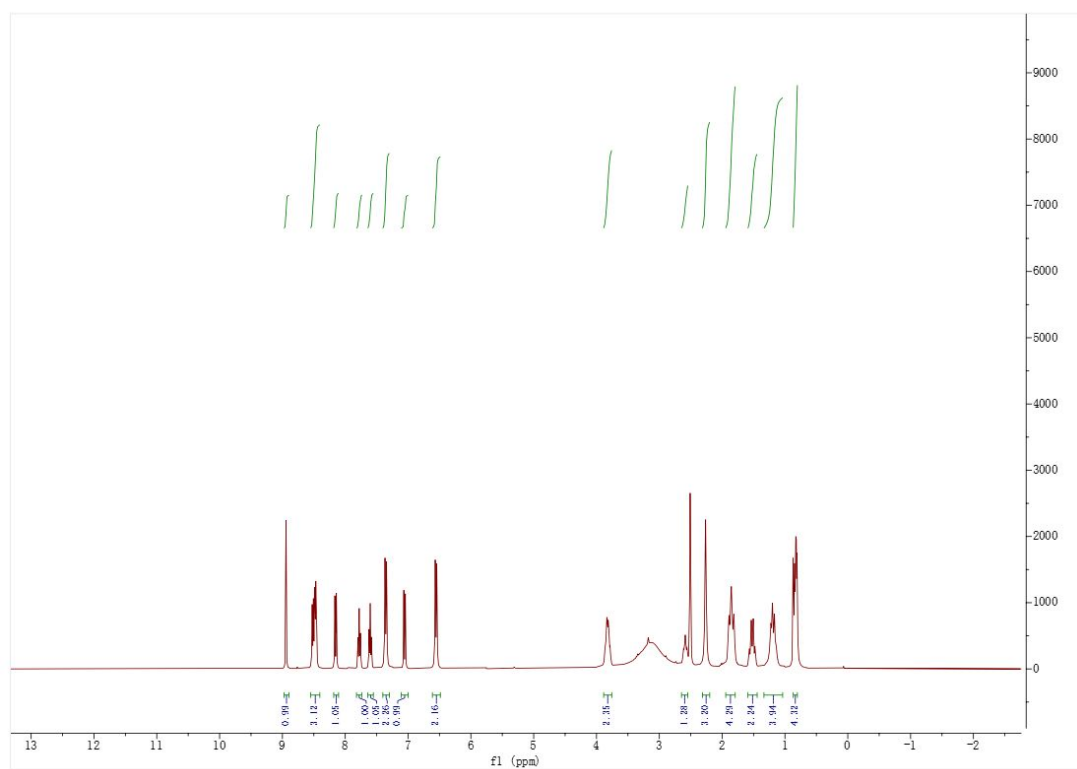

**Figure S12.** <sup>1</sup>H NMR spectrum (400 MHz, DMSO-*d*<sub>6</sub>) of **81**.



## 2. The $^{13}\text{C}$ NMR spectra for 8a-l

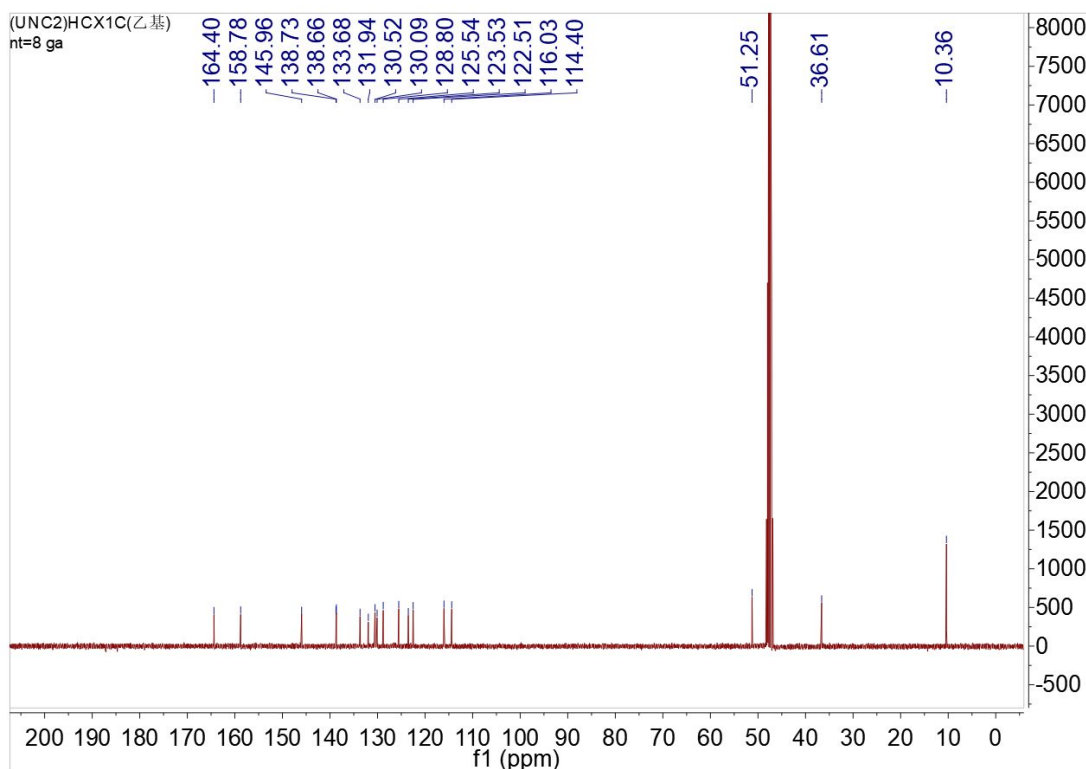

Figure S13.  $^{13}\text{C}$  NMR spectrum (101 MHz,  $\text{DMSO-}d_6$ ) of 8a.

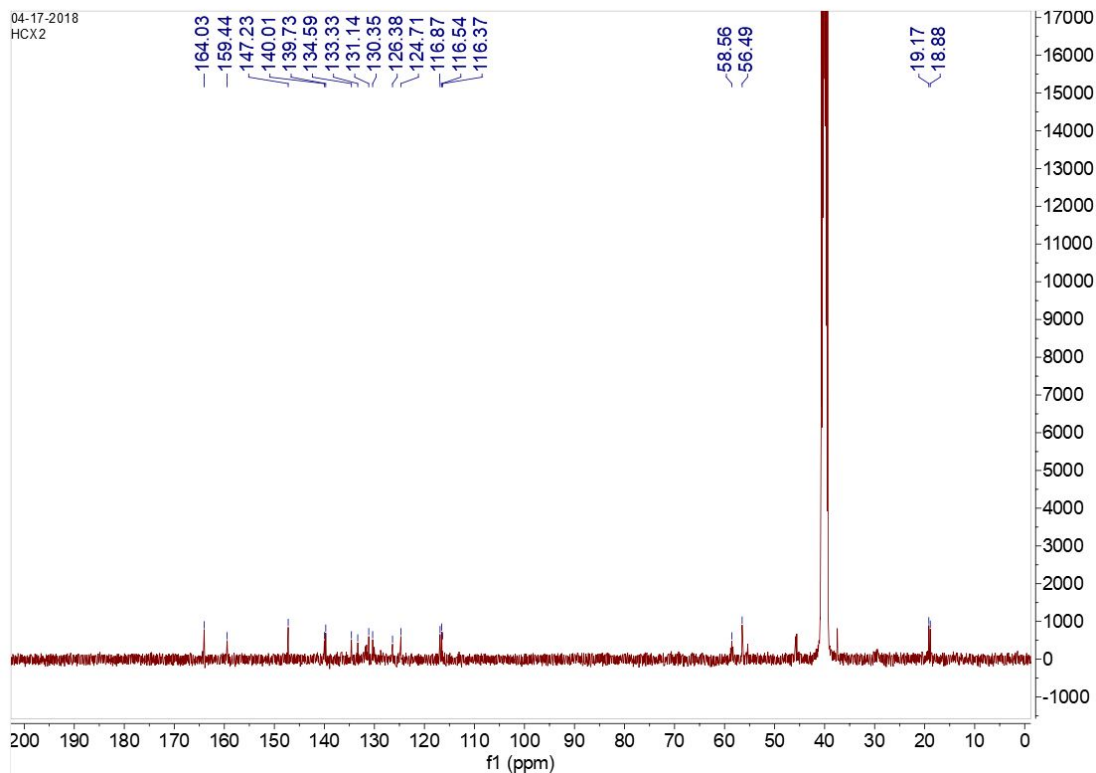

**Figure S14.**  $^{13}\text{C}$  NMR spectrum (101 MHz,  $\text{DMSO-}d_6$ ) of **8b**.

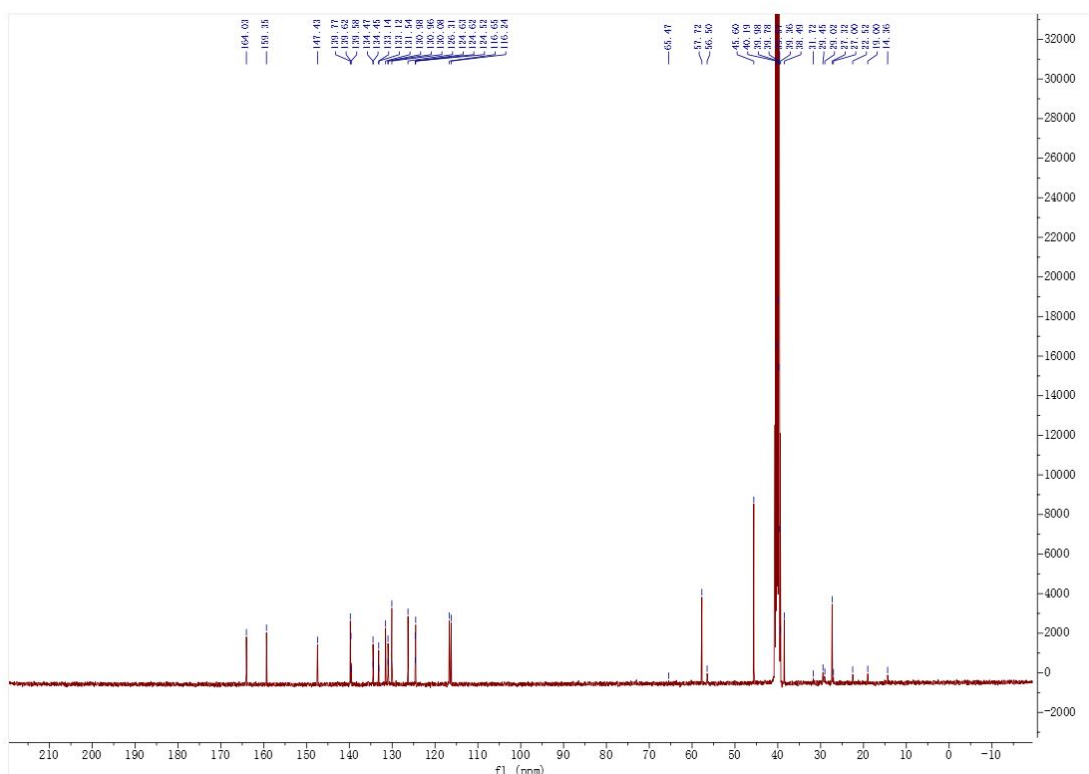

**Figure S15.**  $^{13}\text{C}$  NMR spectrum (101 MHz,  $\text{DMSO-}d_6$ ) of **8c**.

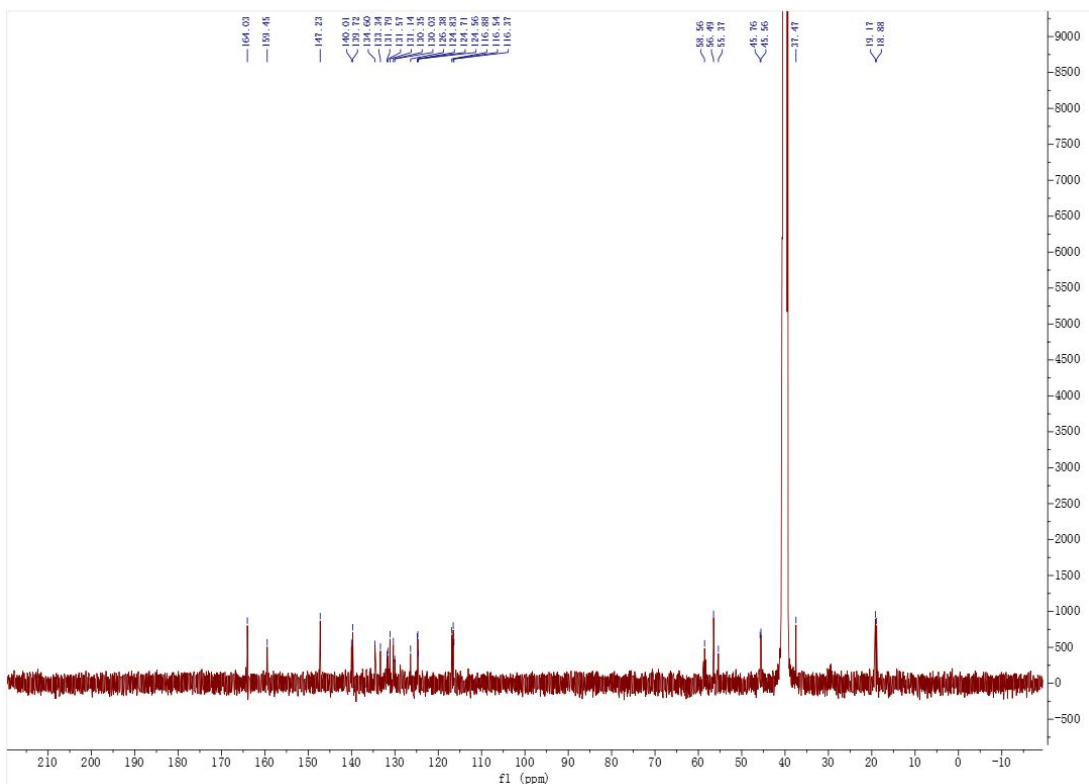

**Figure S16.**  $^{13}\text{C}$  NMR spectrum (101 MHz,  $\text{DMSO-}d_6$ ) of **8d**.

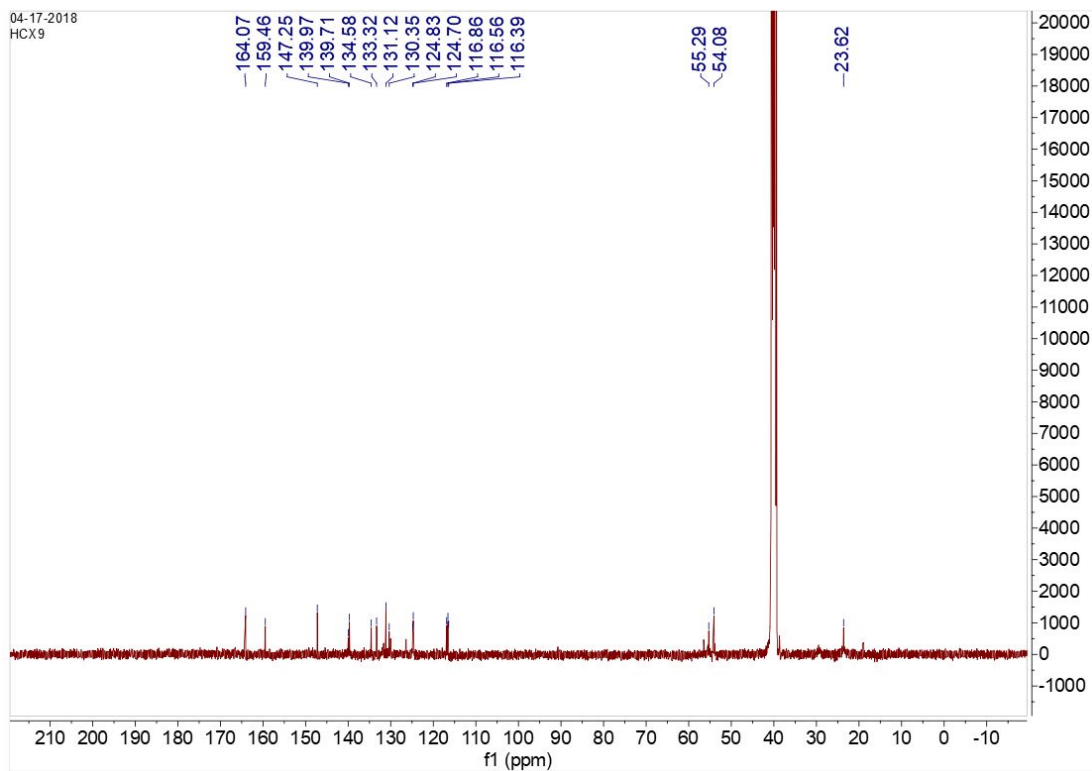

**Figure S17.**  $^{13}\text{C}$  NMR spectrum (101 MHz,  $\text{DMSO-}d_6$ ) of **8e**.

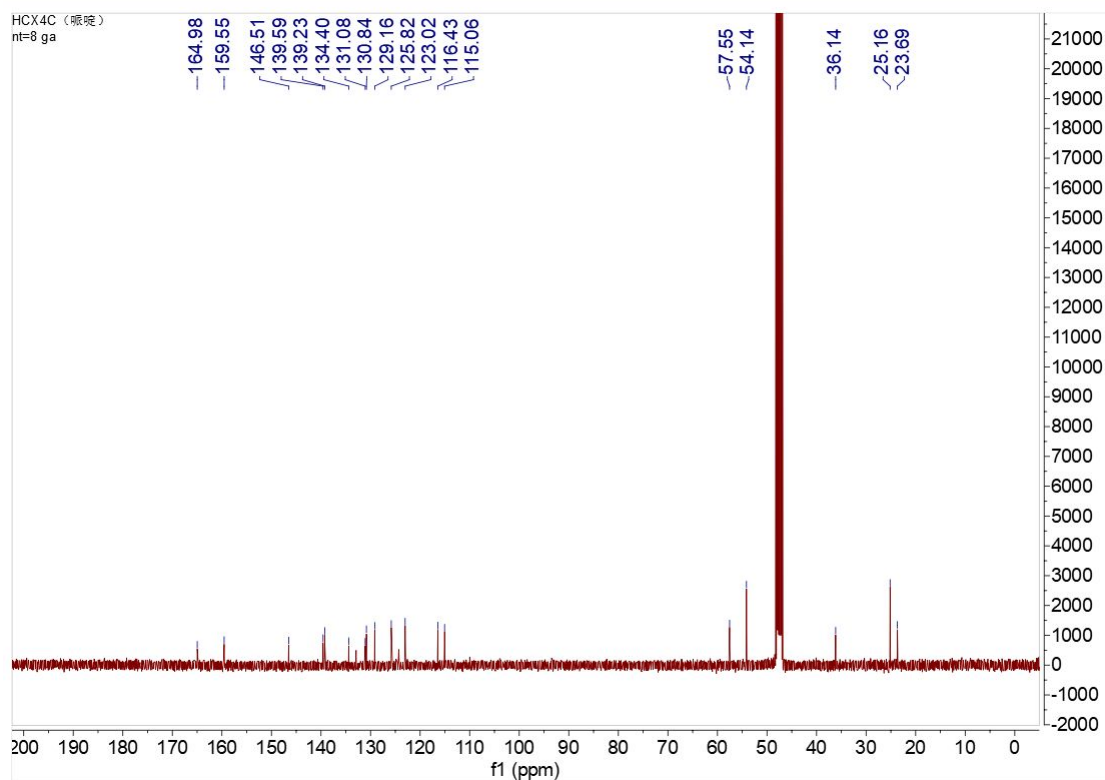

**Figure S18.**  $^{13}\text{C}$  NMR spectrum (101 MHz,  $\text{DMSO-}d_6$ ) of **8f**.

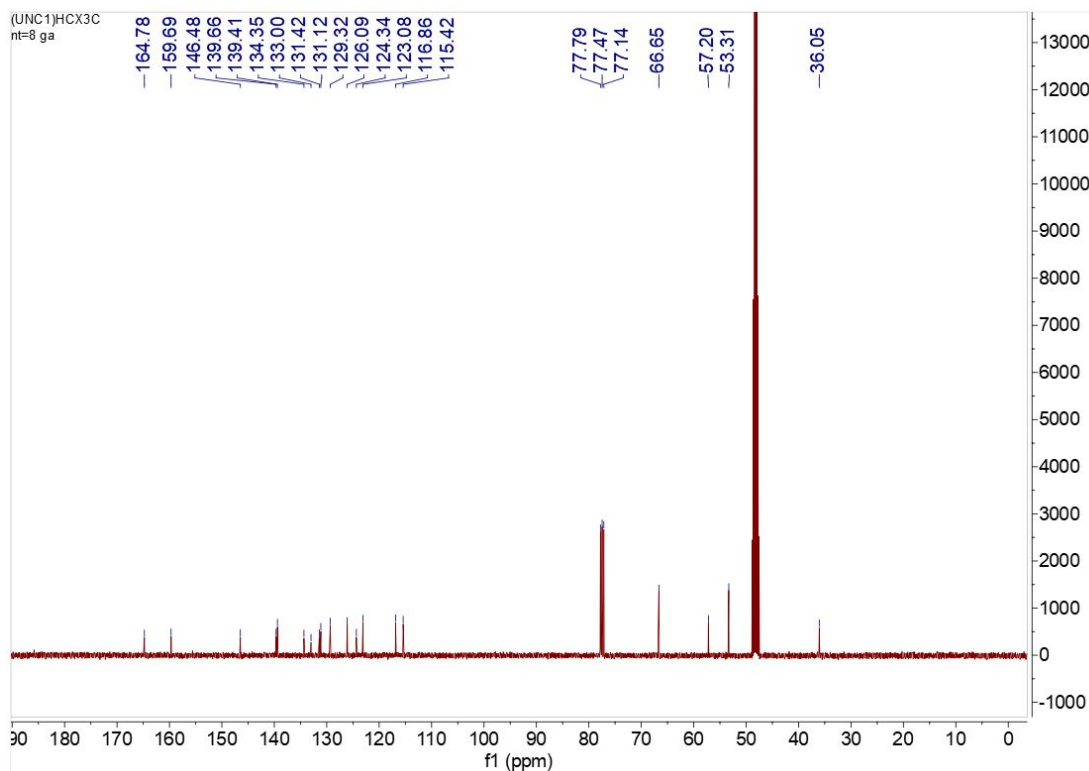

Figure S19.  $^{13}\text{C}$  NMR spectrum (101 MHz,  $\text{DMSO-}d_6$ ) of **8g**.

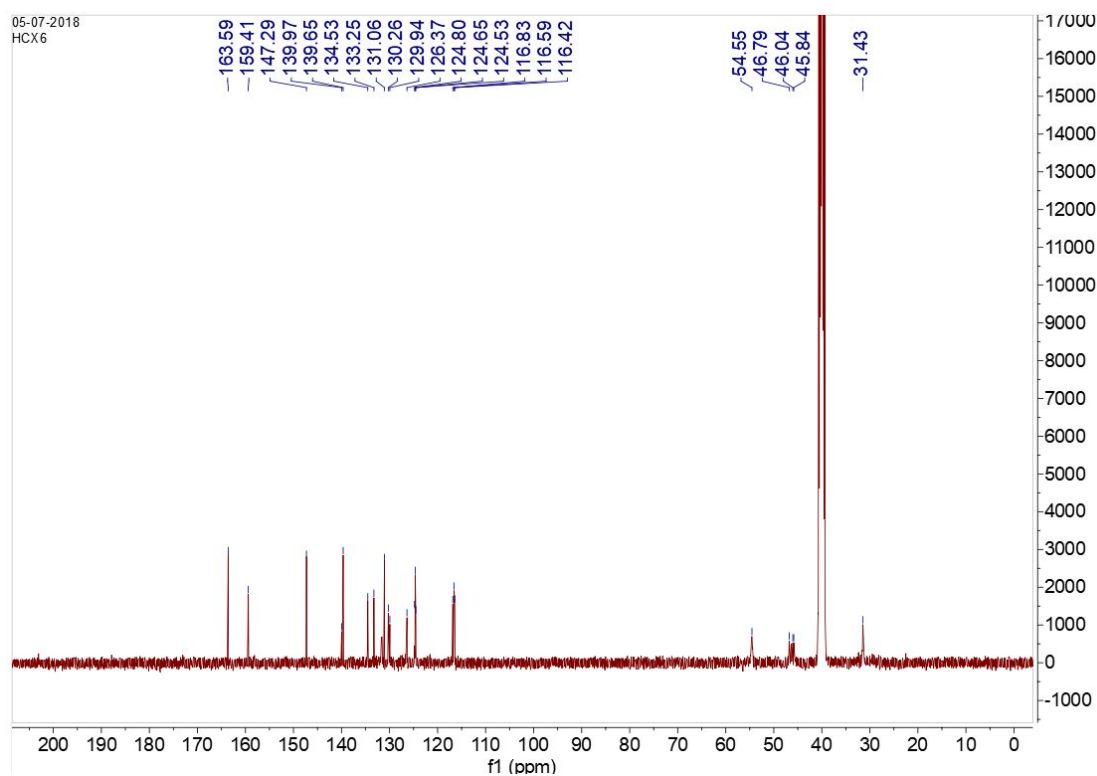

Figure S20.  $^{13}\text{C}$  NMR spectrum (101 MHz,  $\text{DMSO-}d_6$ ) of **8h**.

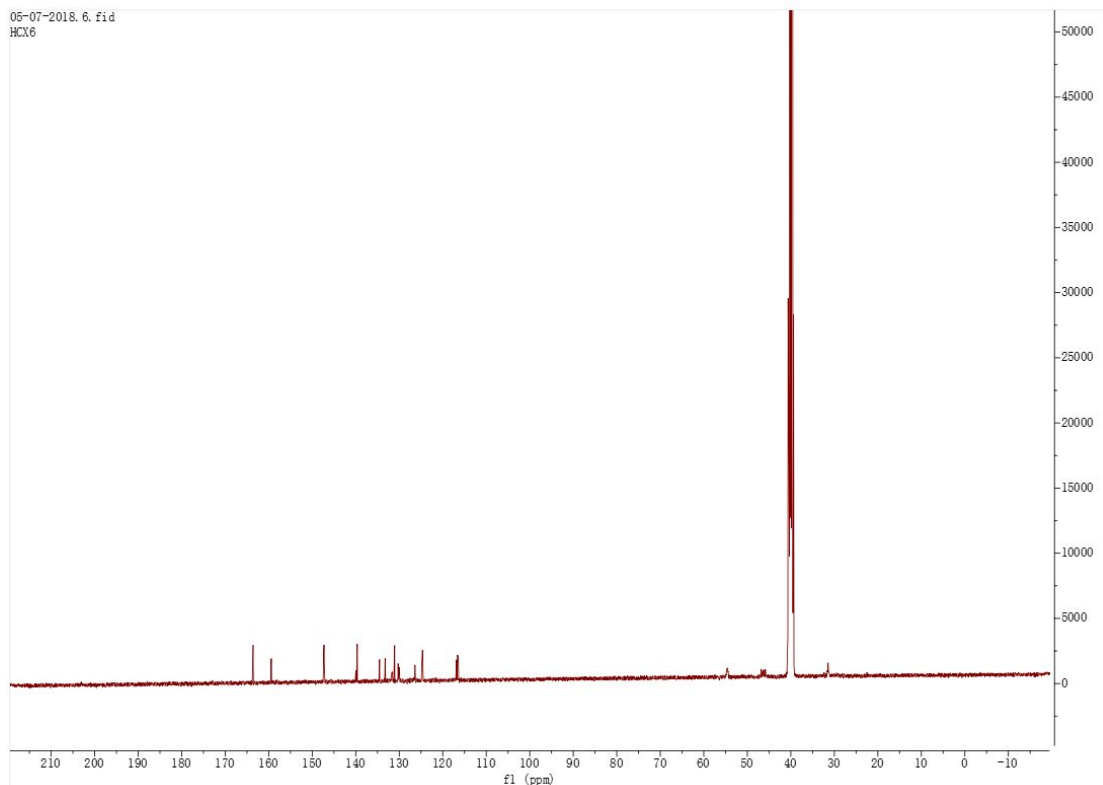

**Figure S21.**  $^{13}\text{C}$  NMR spectrum (101 MHz,  $\text{DMSO-}d_6$ ) of **8i**.

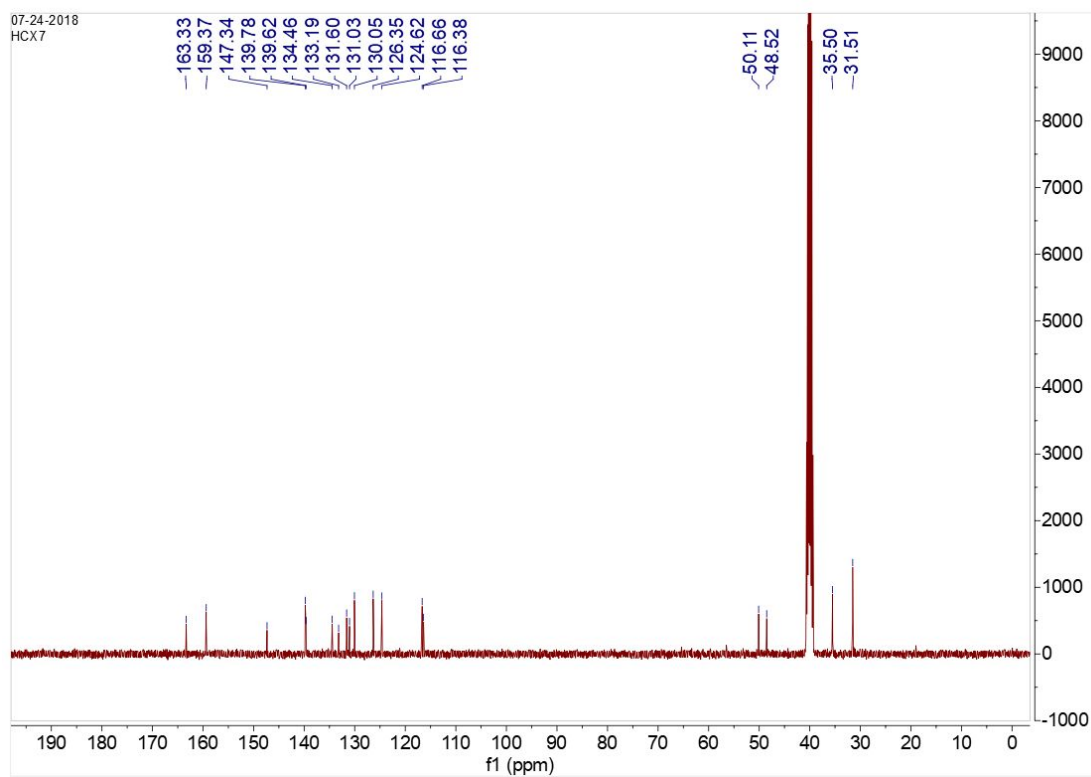

**Figure S22.**  $^{13}\text{C}$  NMR spectrum (101 MHz,  $\text{DMSO-}d_6$ ) of **8j**.

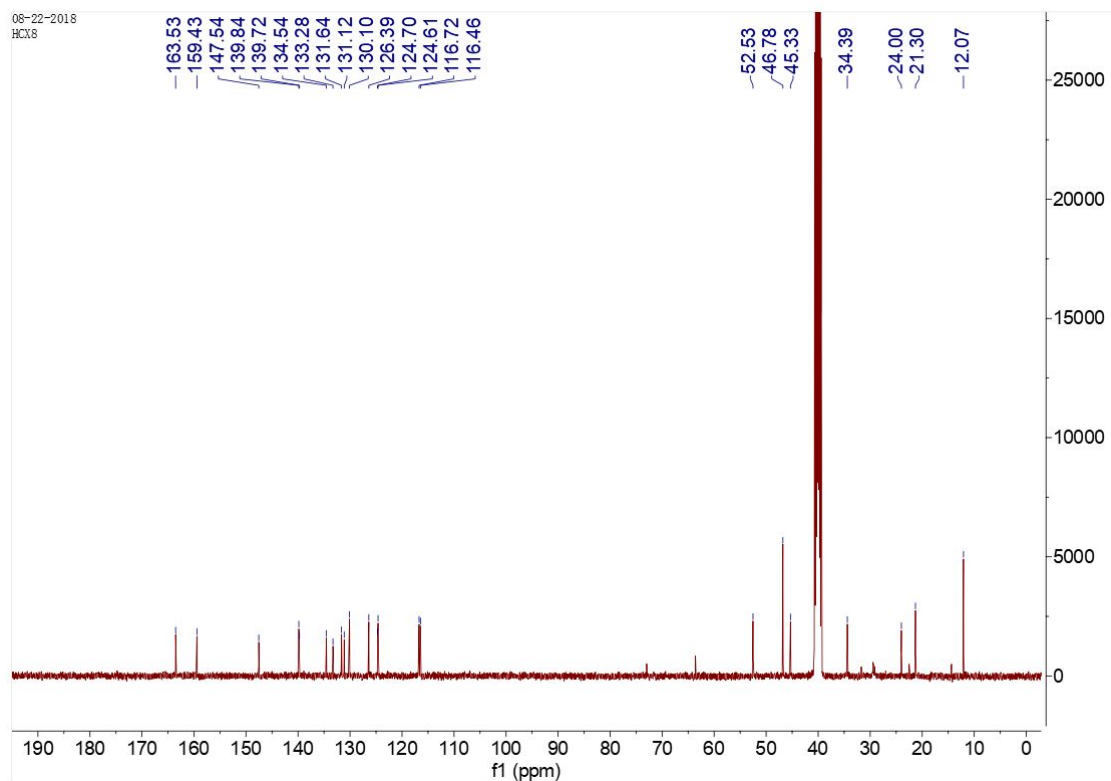

Figure S23.  $^{13}\text{C}$  NMR spectrum (101 MHz,  $\text{DMSO-}d_6$ ) of **8k**.

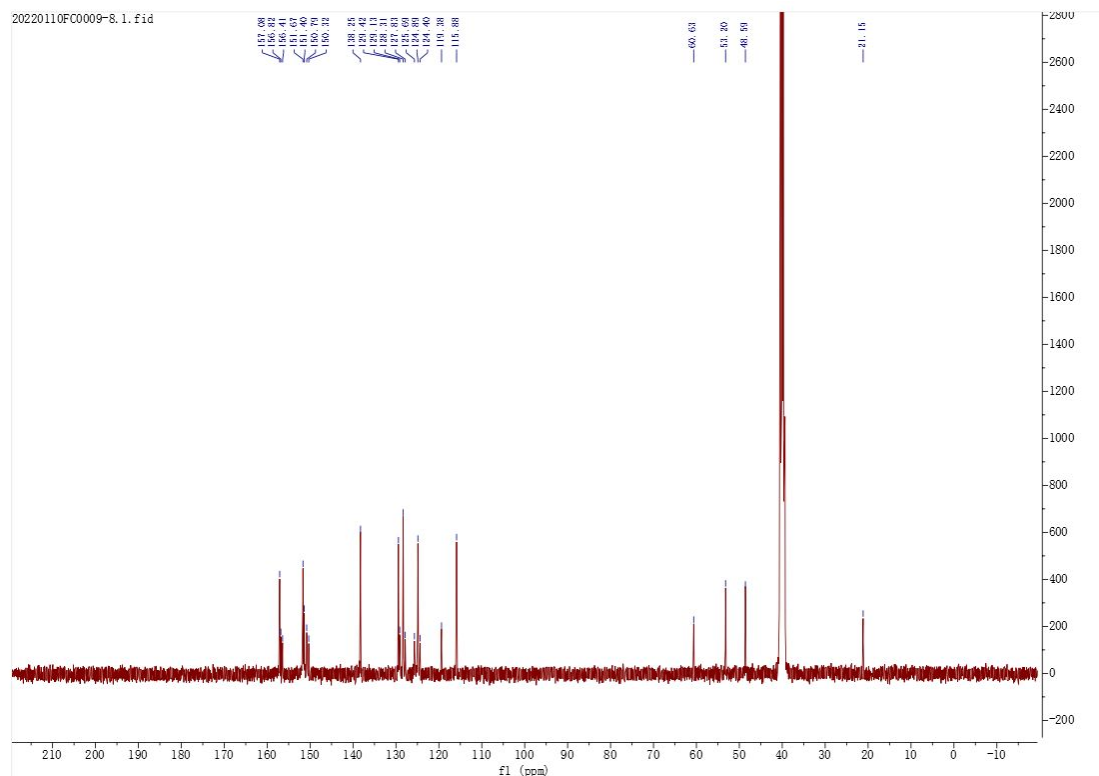

Figure S24.  $^{13}\text{C}$  NMR spectrum (101 MHz,  $\text{DMSO-}d_6$ ) of **8l**.

### 3. The HRMS spectra for 8a-l

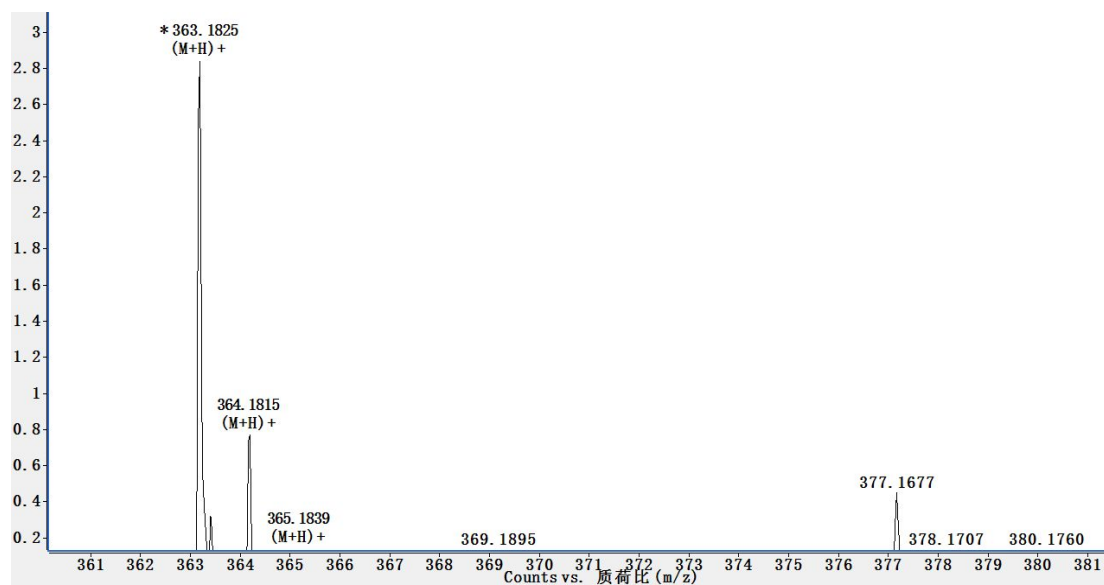

Figure S25. HRMS of 8a.

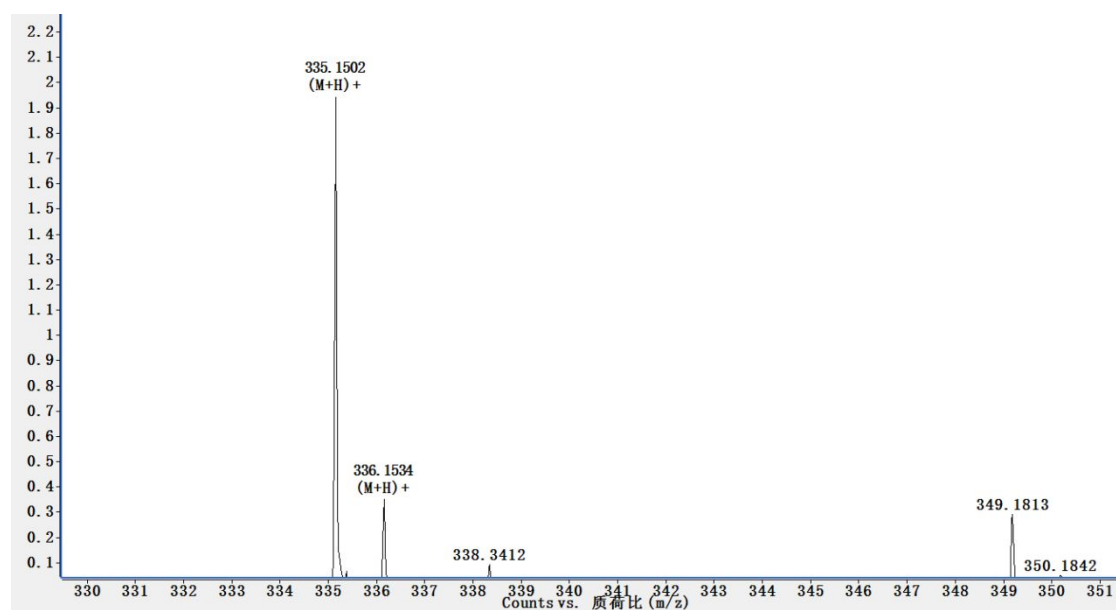

Figure S26. HRMS of 8b.

6 #74 RT: 0.84 AV: 1 NL: 6.58E6  
T: FTMS + c APCI corona Full ms [50.0000-750.0000]

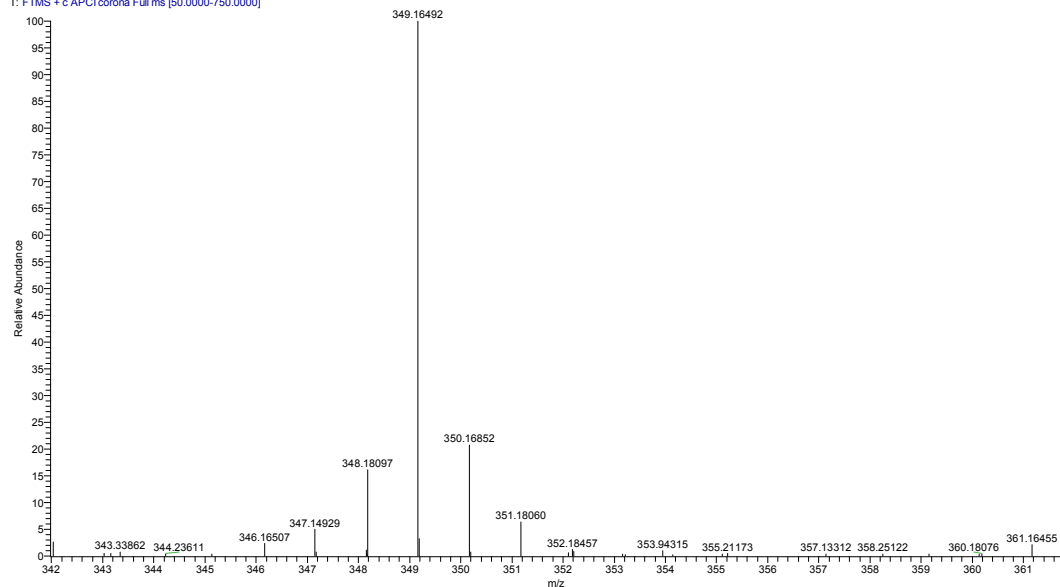

Figure S27. HRMS of 8c.

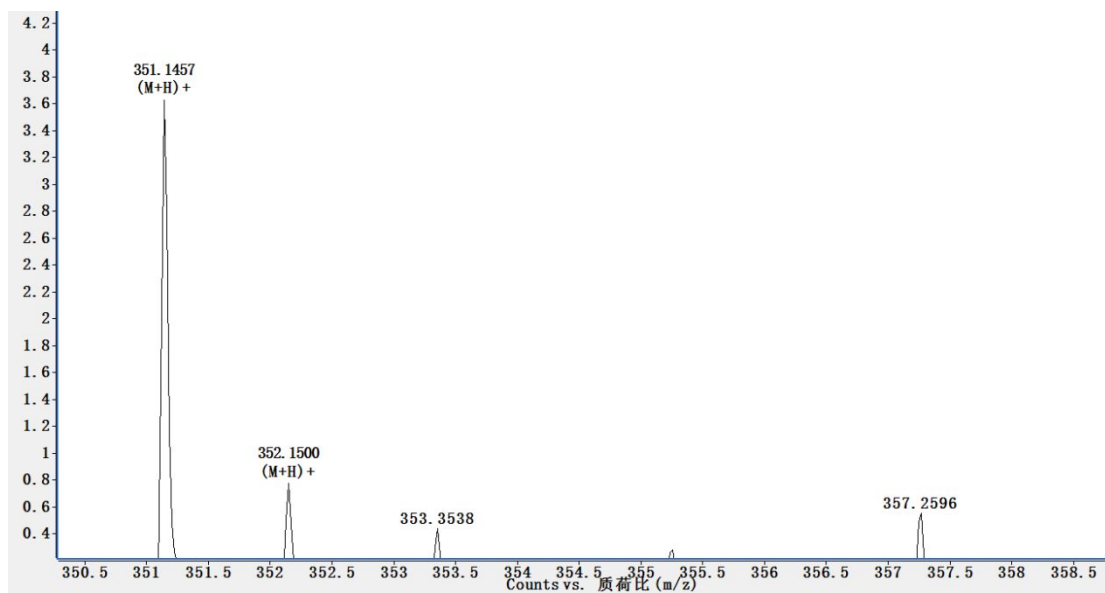

Figure S28. HRMS of 8d.



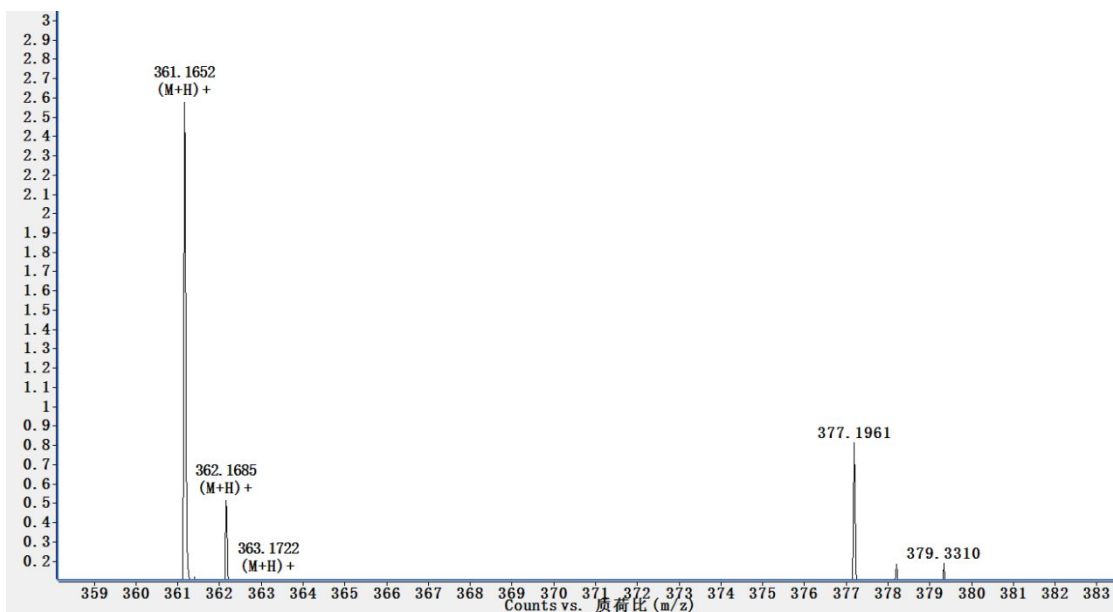

Figure S29. HRMS of 8e.

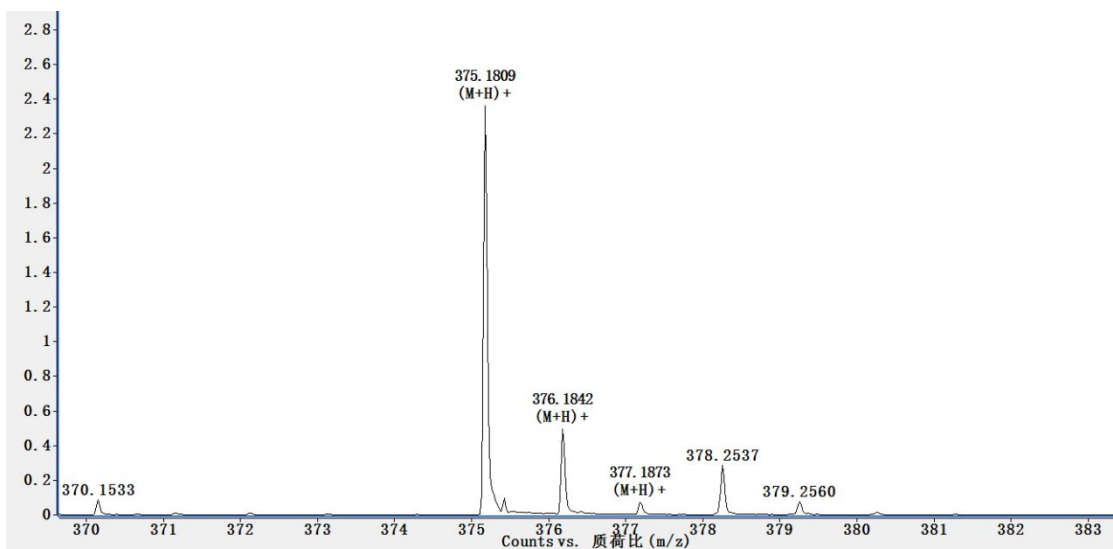

Figure S30. HRMS of 8f.

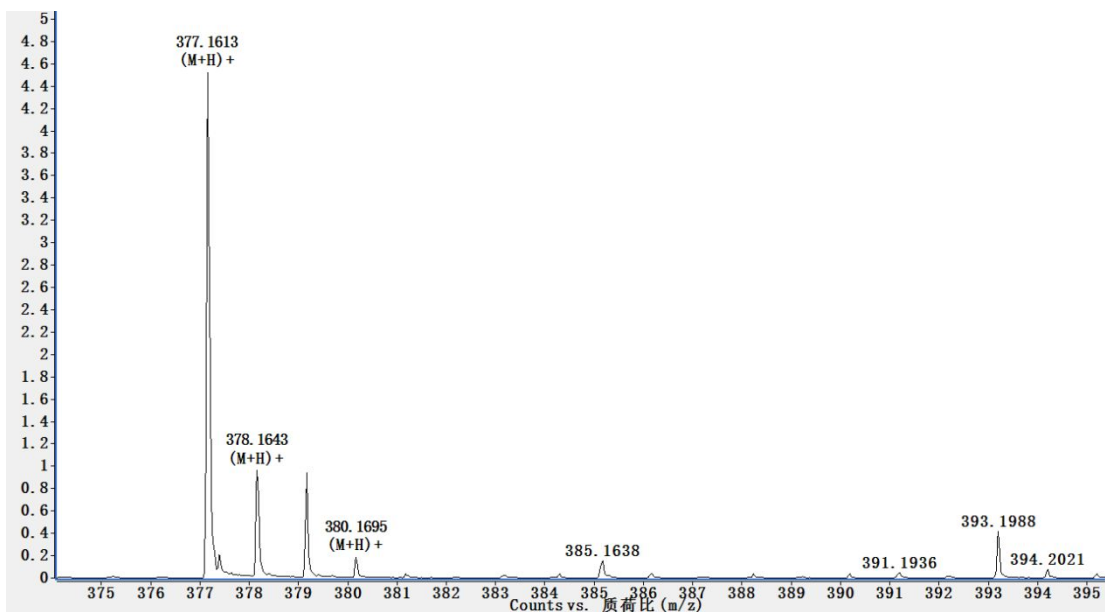

Figure S31. HRMS of 8g.

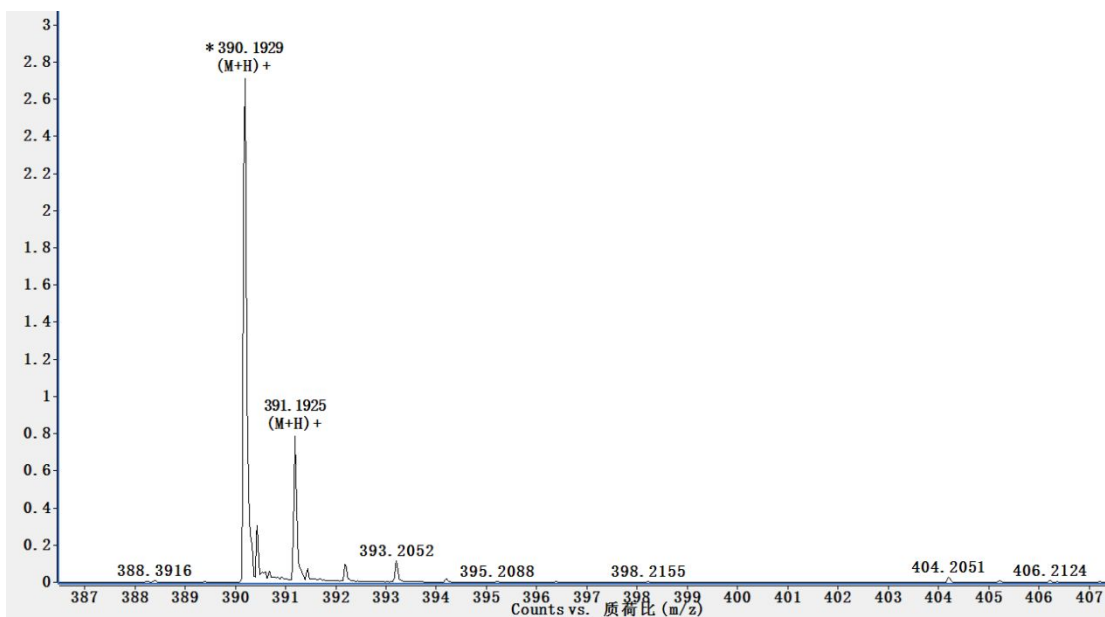

Figure S32. HRMS of 8h.

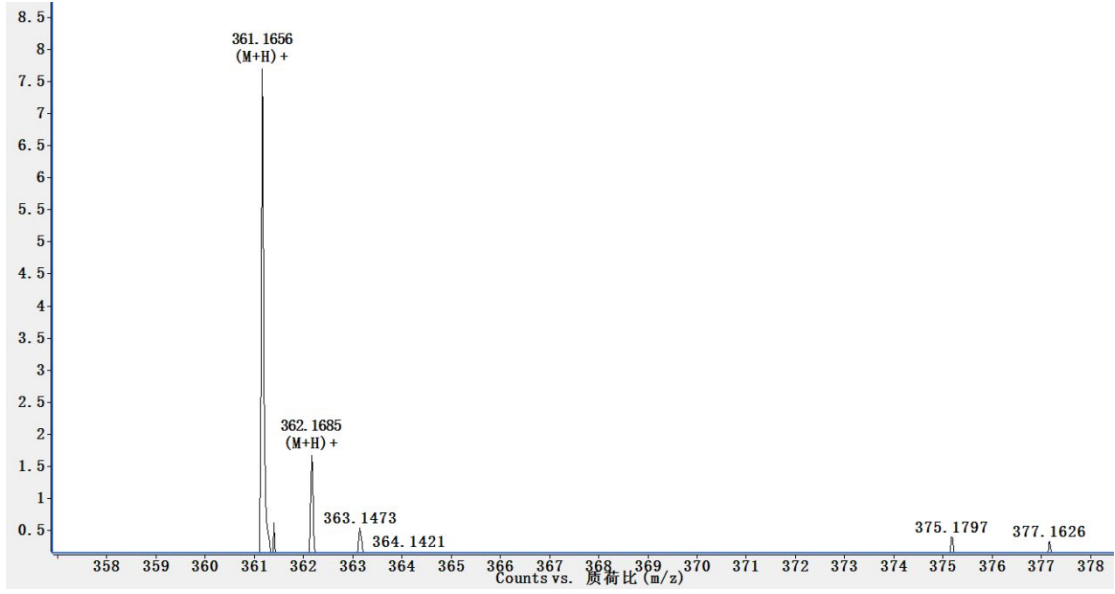

Figure S33. HRMS of 8i.

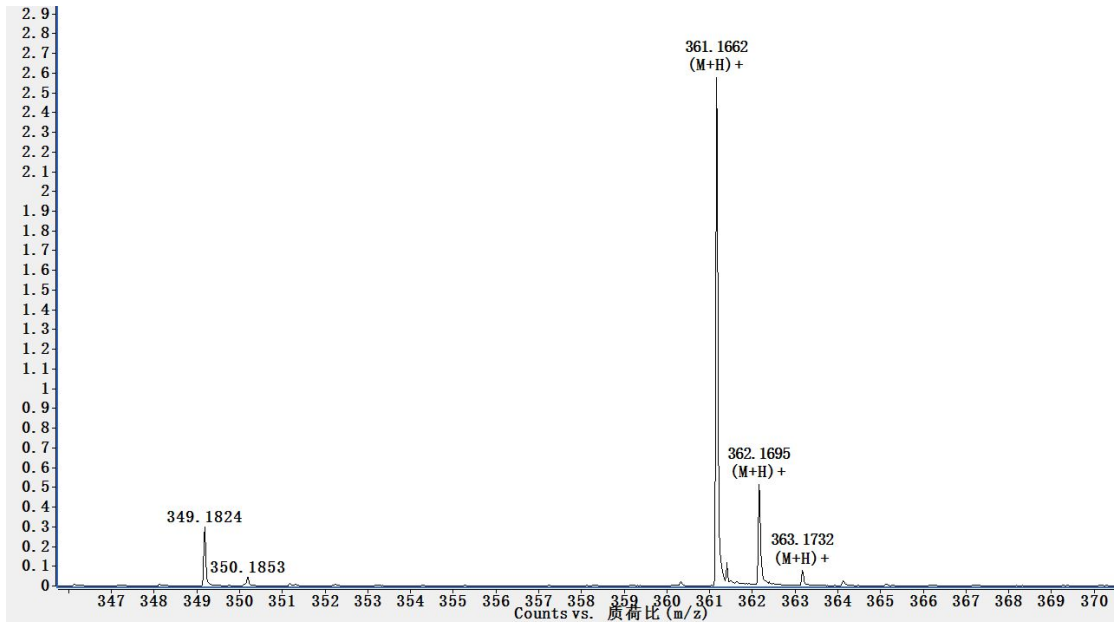

Figure S34. HRMS of 8j.

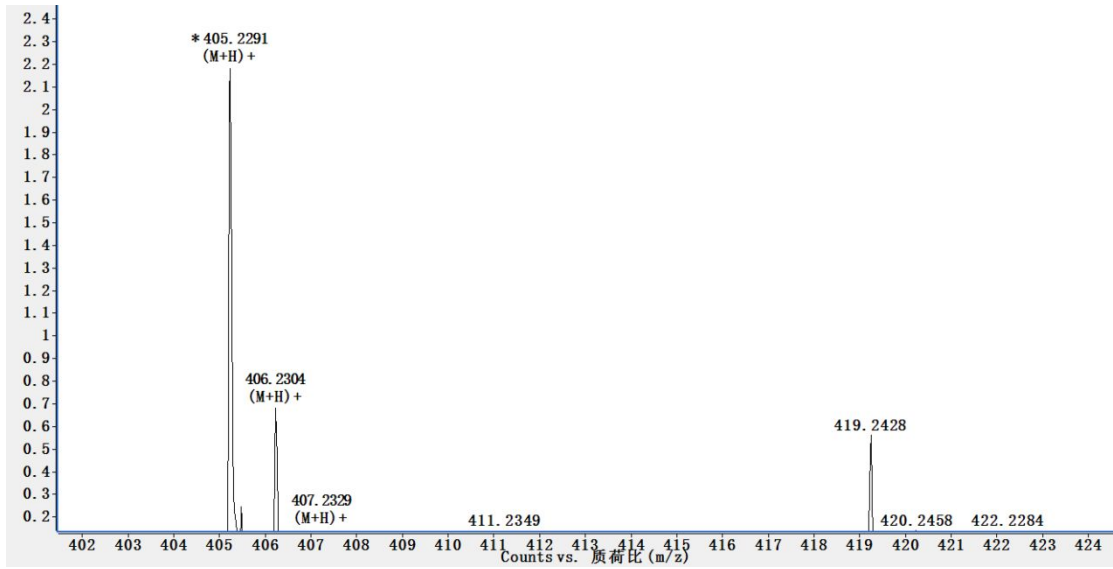

Figure S35. HRMS of 8k.

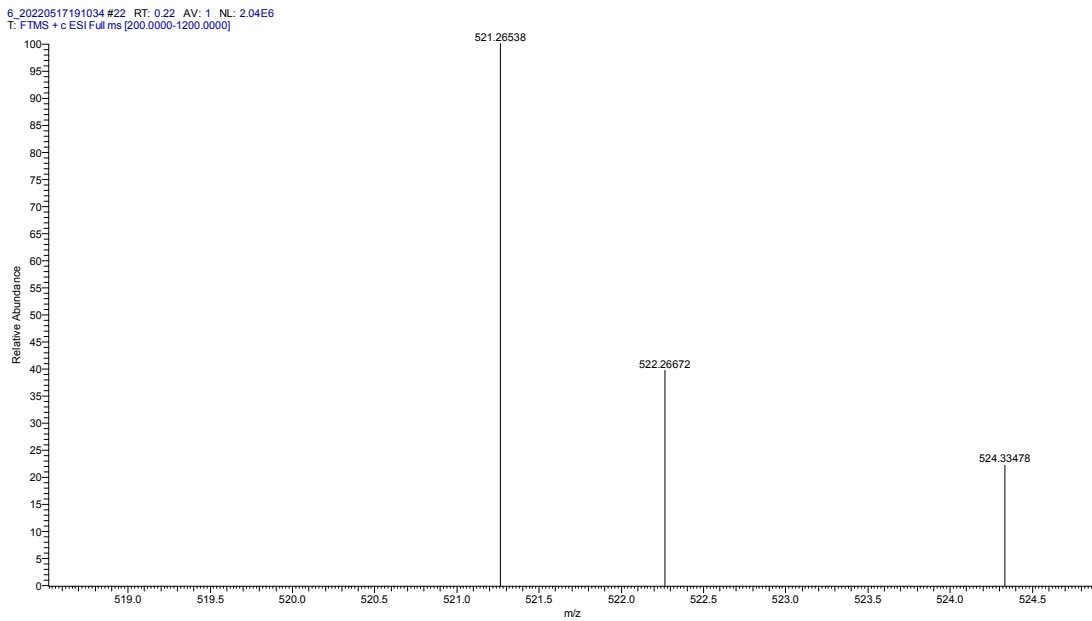

Figure S36. HRMS of 8l.

## 5. The HPLC spectra for 8h

High-performance liquid chromatography (HPLC) analysis methods: column: Agilent C18 (150 mm×4.6 mm×5 μm); mobile phase: methanol (0.1% triethylamine): water = 85:15; wavelength: 254 nm; flow rate: 1 mL/min.

**Purity: 98.2%**

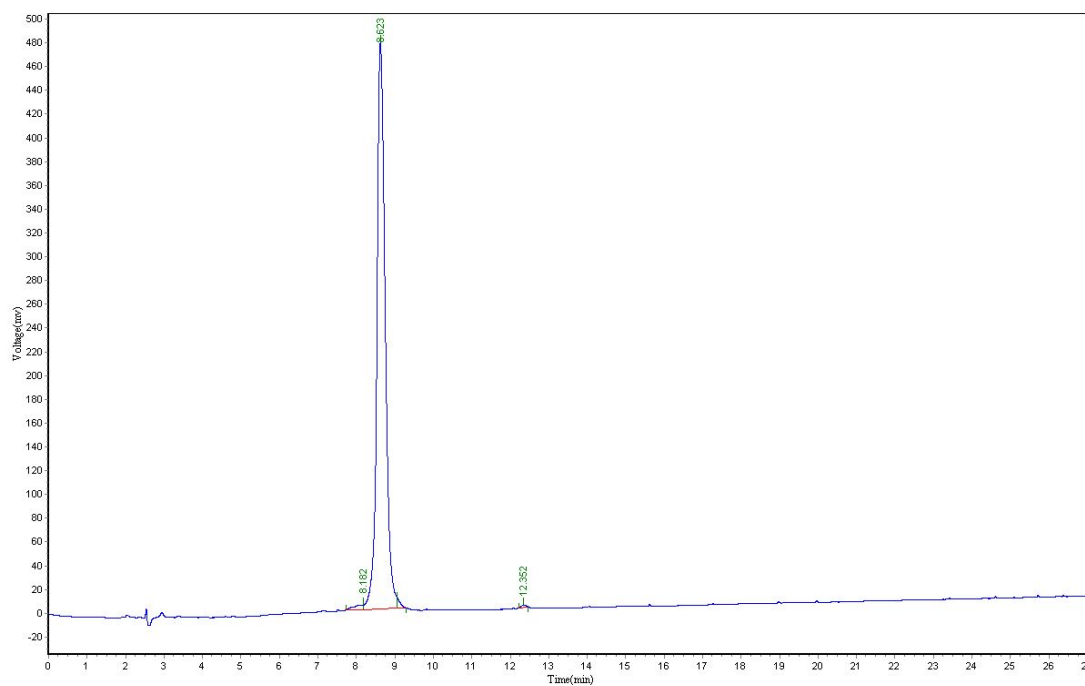

**Figure S37. HPLC of 8h.**
